# Supplementary material for: A freestanding hierarchically structured cathode enables high sulfur loading and energy density of flexible Li–S batteries
Source: Royal Society of Chemistry journal article supplement (doi:10.1039/c9ta14240a), 2020-01-01
Supplement: c9ta14240a6.pdf [file c9ta14240a6.pdf]

## Supplementary information

### **A freestanding hierarchically structured cathode enables high sulfur loading and energy density of flexible Li-S batteries**

Jianpeng Liu,<sup>a,†</sup> Zhong Li,<sup>a,†</sup> Beibei Jia,<sup>a,†</sup> Juncheng Zhu,<sup>b,\*</sup> Wenliang Zhu,<sup>c,\*</sup> Jianping Li,<sup>d</sup> Hao Pan,<sup>d</sup> Bowen Zheng,<sup>a</sup> Liangyin Chen,<sup>e</sup> Giuseppe Pezzotti,<sup>c</sup> and Jiliang Zhu<sup>a\*</sup>

<sup>a</sup>College of Materials Science and Engineering, Sichuan University, Chengdu 610064, China.

<sup>b</sup>School of Chemistry and Materials, University of Science & Technology of China, Hefei, Anhui 230026, China.

<sup>c</sup>Ceramic Physics Laboratory, Kyoto Institute of Technology, Sakyo-ku, Matsugasaki, Kyoto 606-8585, Japan.

<sup>d</sup>Automotive & Transportation Engineering, Shenzhen Polytechnic, Shenzhen 518055, Guangdong, China.

<sup>e</sup>Institute for Industrial Internet Research (I3R), Sichuan University, Chengdu 610064, China

<sup>†</sup>These authors contributed equally to this work.

\*Email address: jc1998@mail.ustc.edu.cn (JC Z), wlzhu@kit.ac.jp (WL Z), jlzhu167@scu.edu.cn (JL Z)

## **Supplementary Methods**

### **Method S1. Synthesis of graphene oxide (GO)**

GO nanosheets were synthesized using pre-oxidized graphite powder via an improved Hummer's method. Typically, 7.5 g  $P_2O_5$ , 7.5 g  $K_2S_2O_8$  and 9 g graphite powder were mixed in 55 mL concentrated sulfuric acid and stirred at 80°C for 5 h. The mixture was filtrated, washed with deionized water and dried overnight to obtain pre-oxidized graphite powder.

The as-prepared pre-oxidized graphite powder, together with 4.5 g  $NaNO_3$  were dispersed in 245 mL concentrated sulfuric acid in an ice bath. Then, 27.8 g  $KMnO_4$  was slowly added into the solution at a system temperature of below 5 °C. After 4 hours of ice bath, the mixture was transferred into a water bath of 35 °C and vigorously stirred for 4 hours. Finally, the mixture was filtrated, washed with diluted HCl and deionized water, respectively, and dried overnight to obtain GO films.

The investigated 3D graphene (3D-G) was obtained by adding ammonia and hydrazine hydrate into a mixture of anhydrous ethanol and water with dispersed GO, keeping the system at 100 °C for 2 h, and then drying up the filtrated cream in a freezer.

### **Method S2. Schematic illustration of soft-packaged cell assembly**

Soft-packaged cells with different capacities were assembled in an Ar-filled glove box. The anode was fabricated by rolling lithium foil (250  $\mu m$ ) onto Cu foil (9  $\mu m$ ). Typically, the cathode and membrane were overlapped and folded into a U shape. Then the anode was inserted into the "U". The whole material was folded again and put into an Al-laminated-film bag. Electrolyte was injected and the battery was vacuum-

packaged after 30 min. The same electrolyte as used in coin cell was utilized in the soft-packaged cell. The ratio of electrolyte volume ( $\mu\text{L}$ ) to the electrode material (S) mass (mg) was 2.9:1 in all test cells. All the cells were packaged at minus ninety kilopascals.

## Supplementary Figures

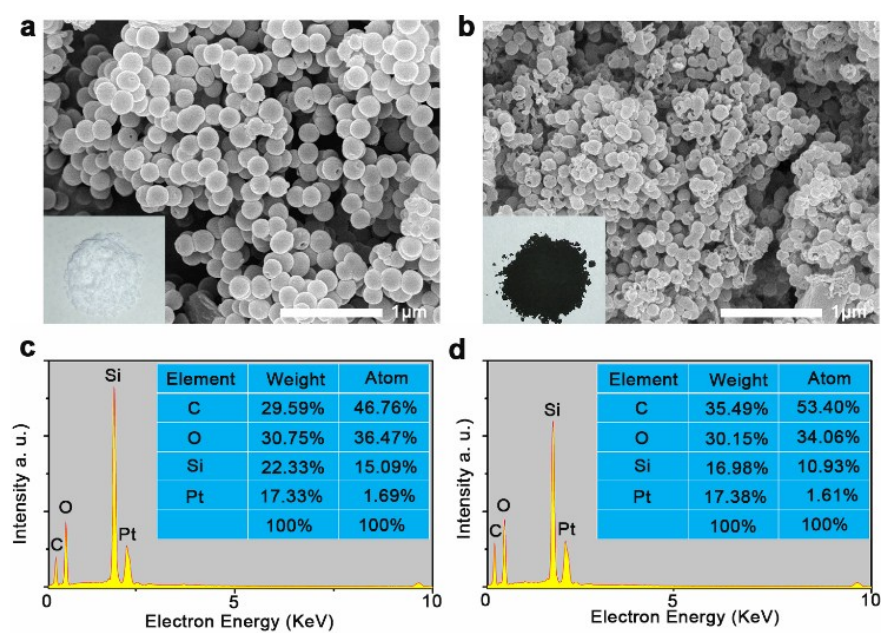

**Fig. S1** | SEM images and EDS spectra of HM-SiO<sub>2</sub> (a,c) and CHM-SiO<sub>2</sub> (b,d). (Pt was detected due to the sputtered Pt coating on the samples for SEM measurements)

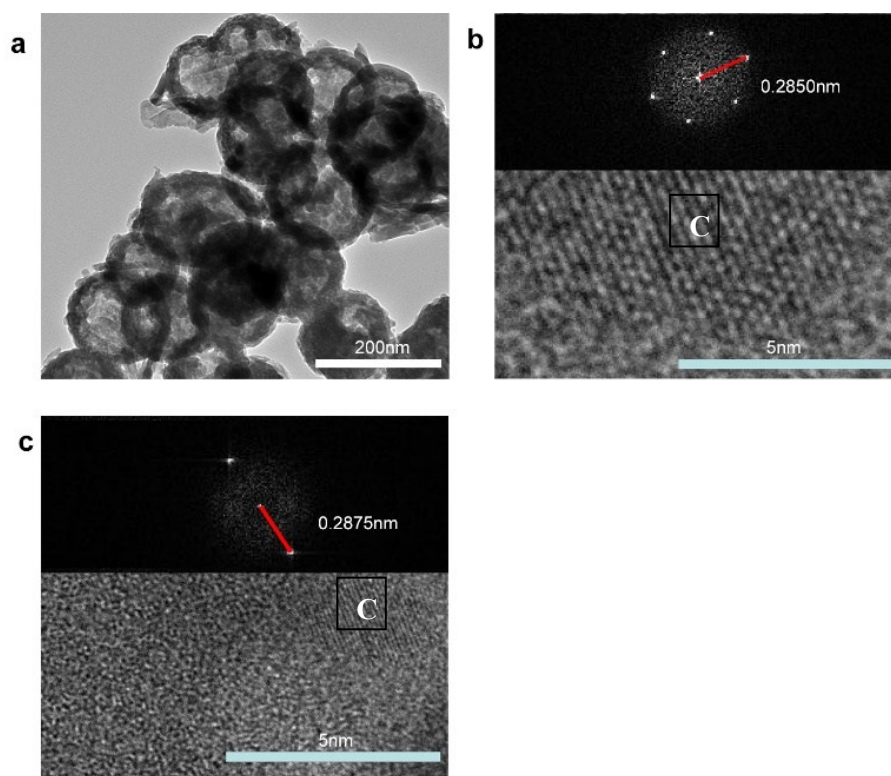

**Fig. S2** | (a) TEM image of CHM-SiO<sub>2</sub>. (b, c) HRTEM images of CHM-SiO<sub>2</sub>.

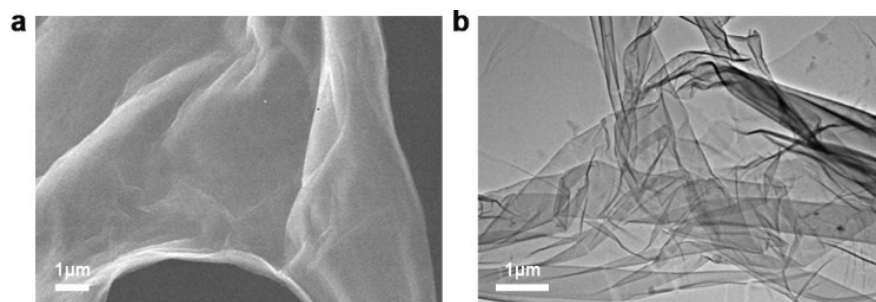

**Fig. S3** | Microscopic characterization of 3D-G. (a) SEM image of 3D-G. (b) TEM image of 3D-G.

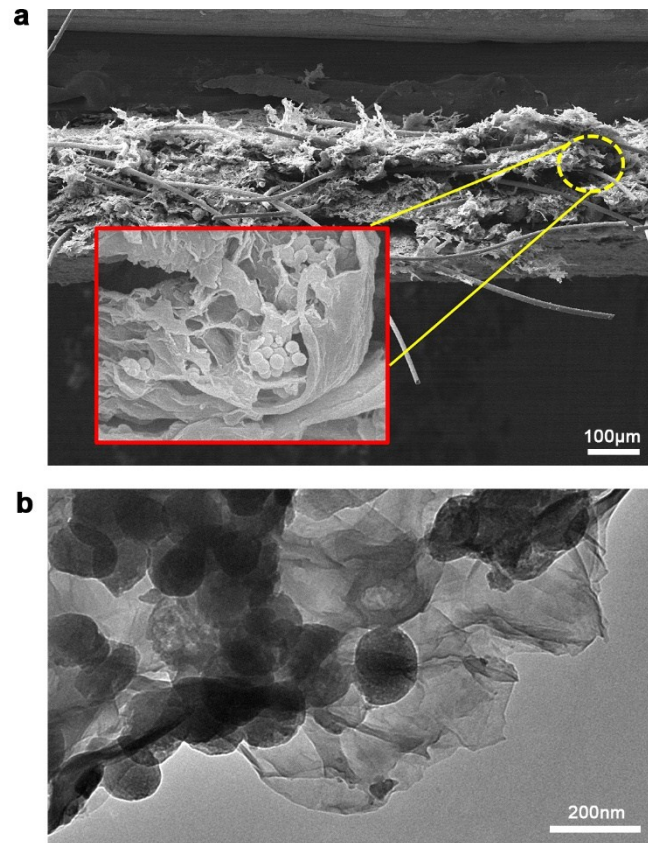

**Fig. S4** | (a) Cross-sectional SEM image of 3D-GCSS. (b) TEM image of CHM-SiO<sub>2</sub>/S on 3D-G.

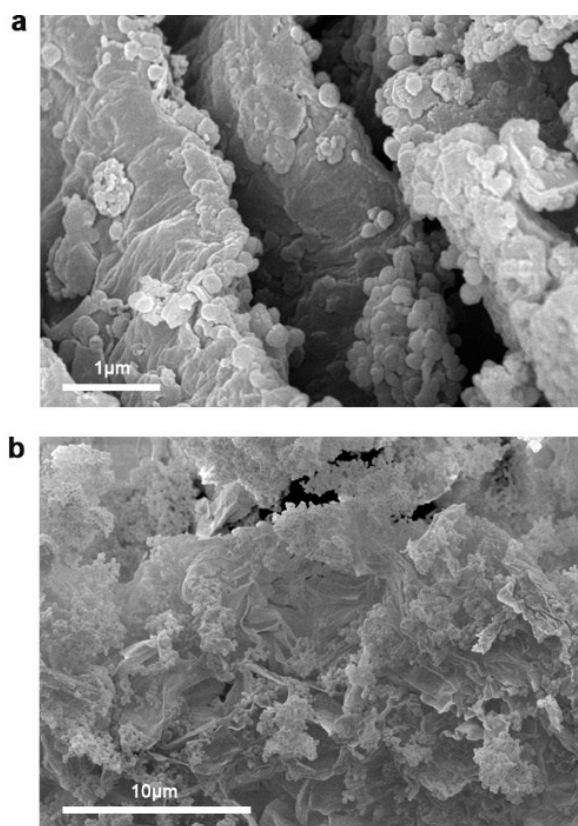

**Fig. S5** | SEM images of CHM-SiO<sub>2</sub> composited with (a) super P and (b) graphite.



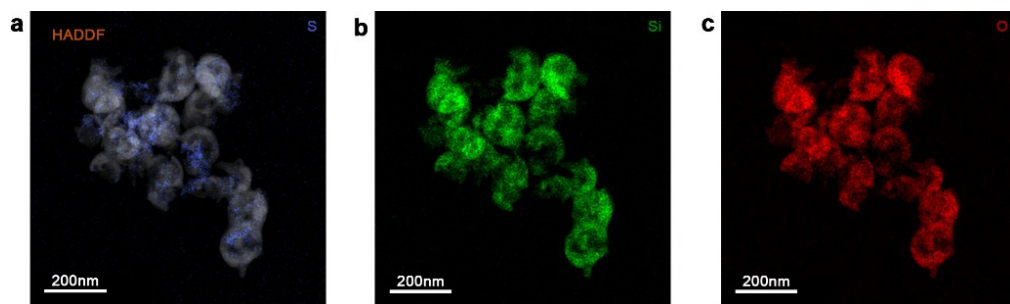

**Fig. S6** | Elemental mapping of (a) S, (b) Si and (c) O in the CHM-SiO<sub>2</sub>/S composite.

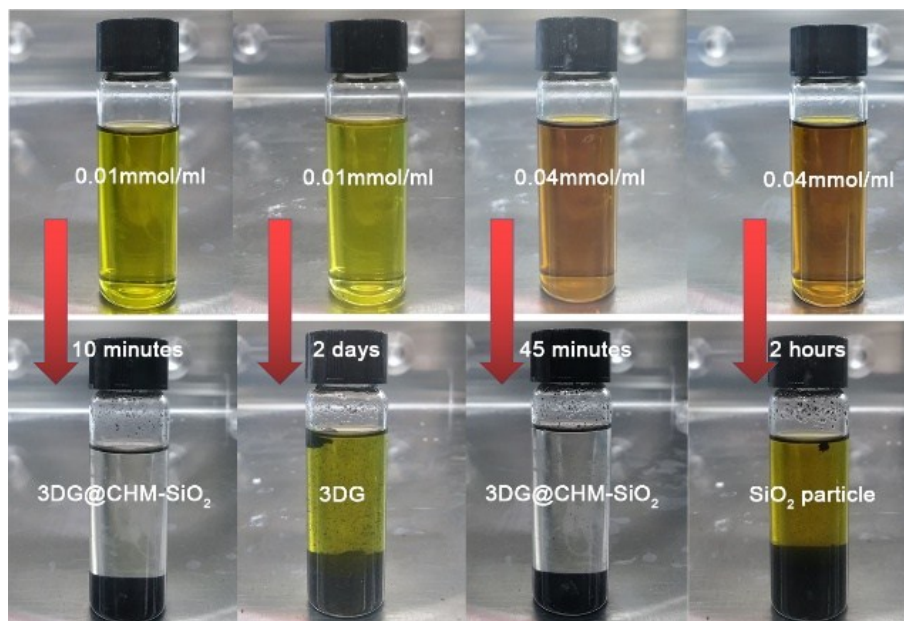

**Fig. S7** | Variations of solution color with the addition of 3D-GCS, 3D-G and commercial SiO<sub>2</sub> in an electrolyte solution of Li<sub>2</sub>S<sub>6</sub>. The yellow/brown Li<sub>2</sub>S<sub>6</sub> solution quickly became transparent and colorless upon adding 3D-GCS demonstrating good affinity and strong capability for LiPS-adsorption of 3D-GCS.

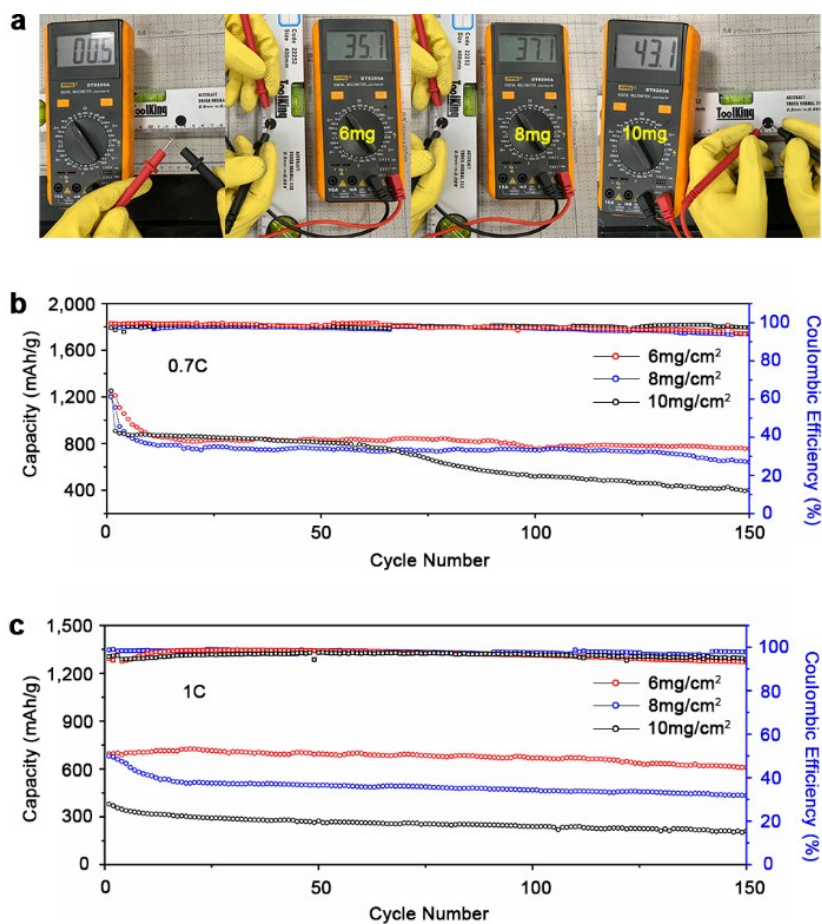

**Fig. S8** | (a) Electrical resistance of 3D-GCSS with different sulfur loading. (b,c) Cycling performance at (b) 0.7C and (c) 1C current rates.

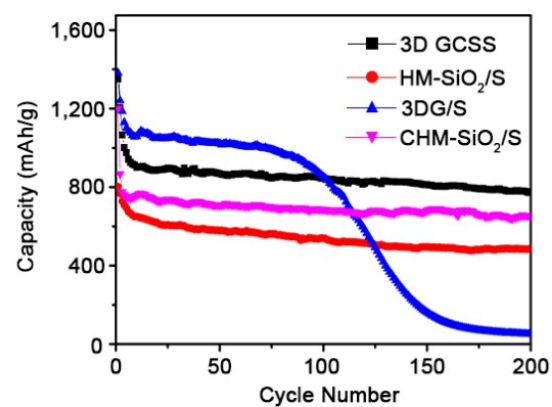

**Fig. S9** | Cycling performances of hollow-mesoporous SiO<sub>2</sub>/S (HM-SiO<sub>2</sub>/S), carbon-encapsulated hollow-mesoporous SiO<sub>2</sub>/S(CHM-SiO<sub>2</sub>/S), 3D-graphene/S (3D-G/S) and 3D-GCSS/Al.

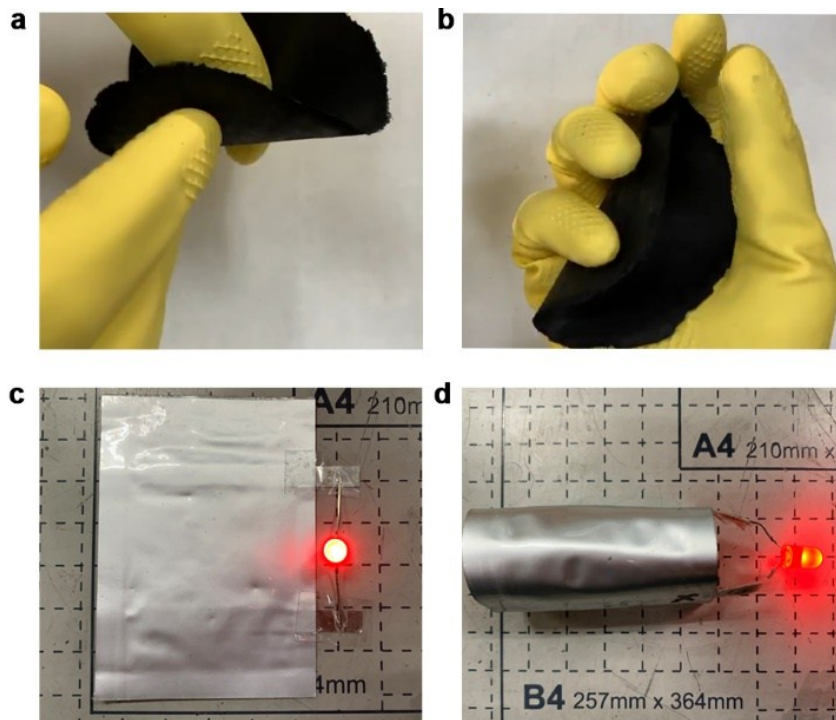

**Fig. S10** | (a,b) The 3D-GCSS electrode under force shows structural integrity and stability. (c,d) The optical images show a red LED lighted by a (c) flat and (d) bent Li-S soft-packaged cell.

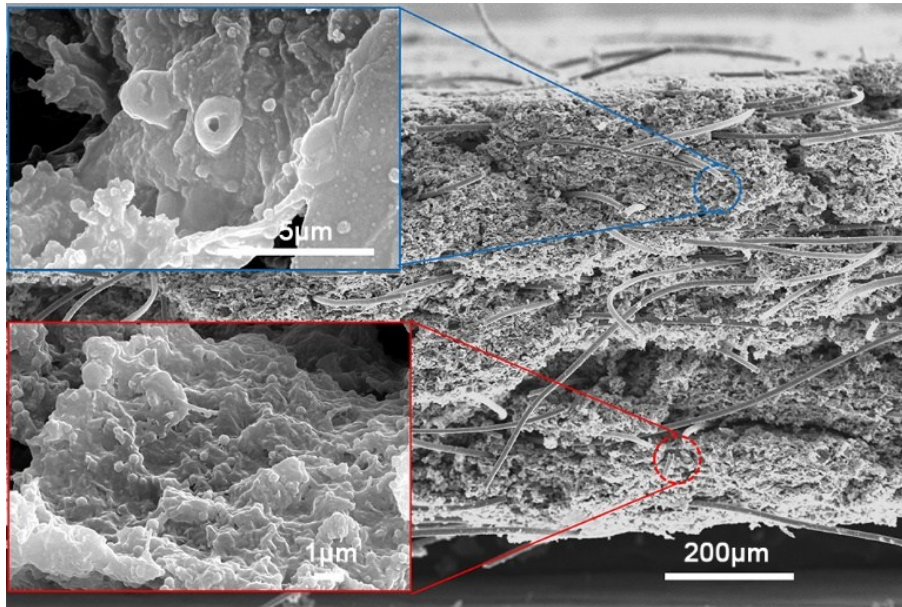

**Supplementary Figure 11** | The cross-sectional SEM image of the 3D-GCSS after cycling.

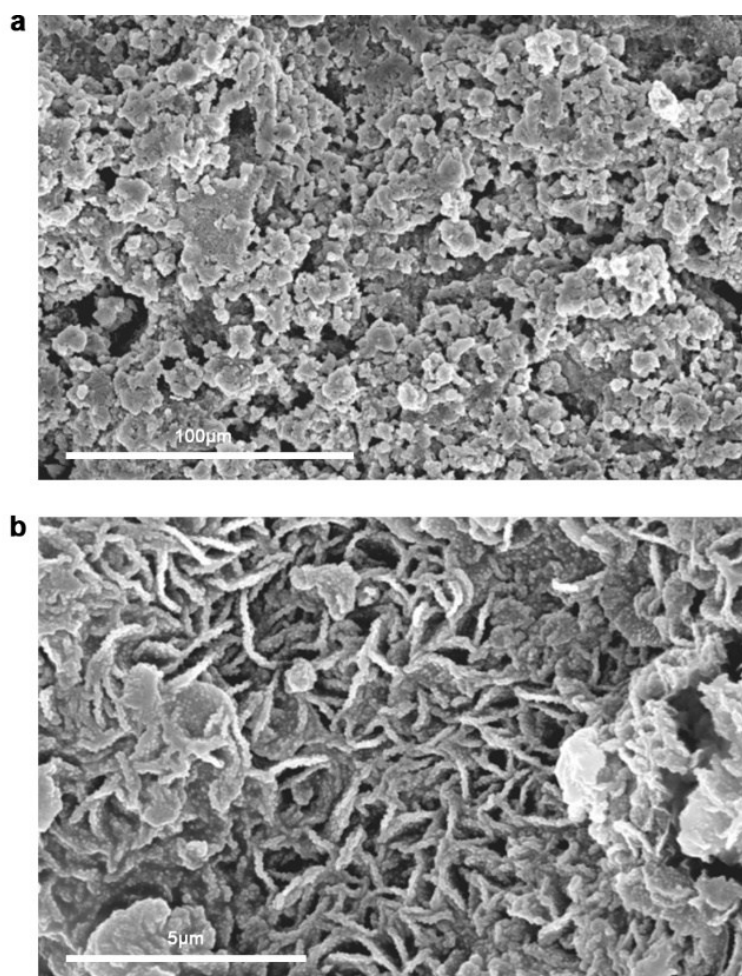

**Supplementary Figure 12** | SEM images of the cross section of the Li anode after cycling obtained at different magnifications. (a) Scale bar, 100 μm. (b) Scale bar, 5 μm.

## Supplementary Tables

**Table S1** | EIS fitting results of 3D-GCSS and 3D-GCSS/Al.

| Cathode           | Rs | R <sub>c</sub><br>t | W-R   | W-T   | W-P     | CPE<br>1-T            | CPE<br>1-P | Rct2  | CPE<br>2-T            | CPE<br>2-P            |
|-------------------|----|---------------------|-------|-------|---------|-----------------------|------------|-------|-----------------------|-----------------------|
| <b>3D-GCSS/Al</b> | 4  | 79.38               | 19.19 | 10.4  | 0.27566 | 1.5567E <sup>-5</sup> | 0.7768     | 25.14 | 9.2774E <sup>-4</sup> | 0.7343                |
| <b>3D-GCSS</b>    | 2  | 5                   | 2.601 | 2.632 | 0.29552 | 1.8E <sup>-4</sup>    | 0.706      | 0.25  | 1.454                 | 3.288E <sup>-10</sup> |



**Table S2** | Cycling performance of HM-SiO<sub>2</sub>/S, CHM-SiO<sub>2</sub>/S and 3D-G/S.

| Cathode                 | 5 <sup>th</sup> Cycling    |                          | 200 <sup>th</sup> Cycling  |                          | Capacity Retention (%) |
|-------------------------|----------------------------|--------------------------|----------------------------|--------------------------|------------------------|
|                         | Discharge Capacity (mAh/g) | Coulombic Efficiency (%) | Discharge Capacity (mAh/g) | Coulombic Efficiency (%) |                        |
| 3D-GCSS/Al              | 1250.0                     | 99.2                     | 772.4                      | 96.1                     | 61.8                   |
| HM-SiO <sub>2</sub> /S  | 650.3                      | 99.8                     | 484.5                      | 97.3                     | 74.5                   |
| 3D-G/S                  | 1241.0                     | 96.5                     | 51.2                       | 82                       | 4.1                    |
| CHM-SiO <sub>2</sub> /S | 974.3                      | 100.0                    | 650.6                      | 98.6                     | 66.8                   |

**Table S3** | Comparisons of the references.

| <b>Coin Cell</b> |                            |                                                                        |                          |                           |
|------------------|----------------------------|------------------------------------------------------------------------|--------------------------|---------------------------|
| <b>Re f.</b>     | <b>Sulfur Loading</b>      | <b>Cycles (Cycling Rate)</b>                                           | <b>Initial Capacity</b>  | <b>Capacity Retention</b> |
| <b>5</b>         | 6.2 mg/cm <sup>2</sup>     | 100 (0.5mA and 1 mA/cm <sup>2</sup> before and after 5 <sup>th</sup> ) | 7.8 mAh/cm <sup>2</sup>  | 83%                       |
| <b>6</b>         | 5.4 mg/cm <sup>2</sup>     | 200 (0.5C)                                                             | 1105 mAh/g               | 799 mAh/g                 |
| <b>8</b>         | 56wt%                      | 500 (1C)                                                               | 1036 mAh/g               | 681 mAh/g                 |
| <b>11</b>        | 9.6 mg/cm <sup>2</sup>     | 100                                                                    | 12.3 mAh/cm <sup>2</sup> | 78%                       |
| <b>12</b>        | 1 mg/cm <sup>2</sup>       | 200 (0.1C)                                                             | 1670 mAh/g               | 1142 mAh/g                |
| <b>14</b>        | 2.5 mg/cm <sup>2</sup>     | 100 (0.2C)                                                             | 983 mAh/g                | 858 mAh/g                 |
| <b>15</b>        | 70wt%                      | 20 (0.1C)                                                              | 1400 mAh/g               | More than 1000 mAh/g      |
| <b>16</b>        | 1.1 mg/cm <sup>2</sup>     | 100 (0.1C)                                                             | 1264 mAh/g               | 866 mAh/g                 |
| <b>17</b>        | 2.9 mg/cm <sup>2</sup>     | 100 (0.2C)                                                             | 1396 mAh/g               | 844 mAh/g                 |
| <b>18</b>        | 14.36 mg/cm <sup>2</sup>   | 350 (0.2C)                                                             | 1000 mAh/g               | 645 mAh/g                 |
| <b>19</b>        | 2.0~3.0 mg/cm <sup>2</sup> | 1500 (1C)                                                              | 745 mAh/g                | 273 mAh/g                 |
| <b>20</b>        | 1.5~2.1 mg/cm <sup>2</sup> | 50 (0.3A/g)                                                            | 1278 mAh/g               | 1150 mAh/g                |
| <b>21</b>        | 3.9 mg/cm <sup>2</sup>     | 100 (0.2C)                                                             | 1360 mAh/g               | 940 mAh/g                 |
| <b>22</b>        | 1.5 mg/cm <sup>2</sup>     | 800 (2C)                                                               | 780 mAh/g                | 480 mAh/g                 |
| <b>23</b>        | 1.0~2.0 mg/cm <sup>2</sup> | 200 (0.2C)                                                             | 1420 mAh/g               | 985 mAh/g                 |
| <b>24</b>        | 1~3 mg/cm <sup>2</sup>     | 100 (0.1C)                                                             | 1044 mAh/g               | 99%                       |
| <b>25</b>        | 0.4~0.6 mg/cm <sup>2</sup> | 1000 (0.5C)                                                            | 1030 mAh/g               | 700 mAh/g                 |
| <b>26</b>        | 4.8 mg/cm <sup>2</sup>     | 100 (0.5C)                                                             | 1510 mAh/g               | 1267 mAh/g                |
| <b>27</b>        | 9.3 mg/cm <sup>2</sup>     | 100 (0.2C)                                                             | More than 1000 mAh/g     | 665 mAh/g                 |

|                               |                                                                                   |                         |                                        |                                 |                        |
|-------------------------------|-----------------------------------------------------------------------------------|-------------------------|----------------------------------------|---------------------------------|------------------------|
| 28                            | 4 mg/cm <sup>2</sup>                                                              | 100 (0.2C)              | 600 mAh/g                              | 570 mAh/g                       |                        |
| 29                            | 4.7 mg/cm <sup>2</sup>                                                            | 90 (0.2C)               | 900 mAh/g                              | 700 mAh/g                       |                        |
| 35                            | 5 mg/cm <sup>2</sup>                                                              | 400 (0.34 A/g)          | 1500 mAh/g                             | 841 mAh/g                       |                        |
| 37                            | 1.3 mg/cm <sup>2</sup>                                                            | 100 (0.75 A/g)          | 1052 mAh/g                             | 950 mAh/g                       |                        |
| Soft-packaged Cell            |                                                                                   |                         |                                        |                                 |                        |
| Re f.                         | Sulfur Loading                                                                    | Cycles                  | Capacity                               | Energy Density                  |                        |
| 5                             | 6.9 mg/cm <sup>2</sup>                                                            | 11                      | 1Ah level                              | 366 Wh/kg<br>581 Wh/L           |                        |
| 8                             | —                                                                                 | 50                      | 1187 mAh/g                             | 1416 Wh/kg<br>(For Cathode)     |                        |
| 16                            | —                                                                                 | 30                      | 985 mAh/g<br>(under bending condition) | N/A                             |                        |
| 25                            | 0.4~0.6 mg/cm <sup>2</sup>                                                        | Discharge for over 20 h | 1110 mAh/g                             | N/A                             |                        |
| Cell performance of this work |                                                                                   |                         |                                        |                                 |                        |
| Cell type                     | Cell parameters                                                                   | Calculati on item       | Surfer load (mg/cm <sup>2</sup> )      | Current density (1 C=1672 mA/g) | Energy density (Wh/kg) |
| Coin                          | Cathode surface area: 1.1 cm <sup>2</sup><br><br>2302 TYPE                        | Cathode                 | 6                                      | 0.50 C                          | 2050                   |
|                               |                                                                                   |                         |                                        | 0.70 C                          | 1701                   |
|                               |                                                                                   |                         |                                        | 1.00 C                          | 973                    |
|                               |                                                                                   |                         | 8                                      | 0.50 C                          | 1880                   |
|                               |                                                                                   |                         |                                        | 0.70 C                          | 1566                   |
|                               |                                                                                   |                         |                                        | 1.00 C                          | 960                    |
|                               |                                                                                   |                         | 10                                     | 0.50 C                          | 1549                   |
|                               |                                                                                   |                         |                                        | 0.70 C                          | 1277                   |
|                               |                                                                                   |                         |                                        | 1.00 C                          | 534                    |
| Soft-package d Cell           | Cathode: 160 cm <sup>2</sup><br><br>Capacitance: 2.15 Ah<br><br>Size: 4 cm×5 cm×3 | Entire cell             | 20                                     | 0.75 mA/cm <sup>2</sup>         | 371                    |
|                               |                                                                                   | Cathode                 | 20                                     | 0.75 mA/cm <sup>2</sup>         | 1055                   |

|                                                       |                                                                                    |                    |                                                                            |                         |      |
|-------------------------------------------------------|------------------------------------------------------------------------------------|--------------------|----------------------------------------------------------------------------|-------------------------|------|
|                                                       |                                                                                    | Cathode<br>+ Anode | 20                                                                         | 0.75 mA/cm <sup>2</sup> | 782  |
| <b>Pouch<br/>Cell<br/>shown<br/>in the<br/>movies</b> | Cathode:<br>27 cm <sup>2</sup><br>Capacitance: 0.6 Ah<br>Size:<br>3 cm×9 cm×300 μm | Cathode            | 20<br>(Fixed<br>bending)<br>20 (Continuou<br>s bending for<br>1000 cycles) | 0.1 C                   | 1616 |

**Table S4** | The EIS fitting results of soft-packaged cell.

| 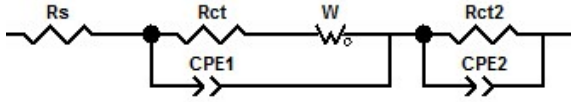 |      |      |       |     |       |              |        |      |        |        |
|------------------------------------------------------------------------------------|------|------|-------|-----|-------|--------------|--------|------|--------|--------|
| Cycling Condition                                                                  | Rs   | Rct  | W-R   | W-T | W-P   | CPE1-T       | CPE1-P | Rct2 | CPE2-T | CPE2-P |
| Before discharging                                                                 | 1.28 | 0.38 | 1.22  | 1   | 0.105 | $E^{-4}$     | 0.85   | 0.15 | 0.01   | 0.8    |
| After 1 <sup>st</sup>                                                              | 1.4  | 1.09 | 0.7   | 8.6 | 0.25  | $1.9 E^{-4}$ | 0.78   | 0.15 | 0.01   | 0.9    |
| After 5 <sup>th</sup>                                                              | 1.35 | 1.12 | 1.155 | 22  | 0.29  | $8E^{-5}$    | 0.87   | 0.15 | 0.01   | 0.9    |
| After 15 <sup>th</sup>                                                             | 1.1  | 1.15 | 0.5   | 5   | 0.325 | $7E^{-5}$    | 0.879  | 0.54 | 0.2    | 0.32   |

**Table S5** | The EIS fitting results of bending soft-packaged cell.

| 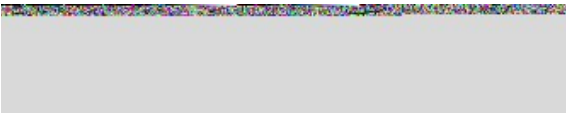 |      |     |     |     |         |             |        |      |        |        |
|------------------------------------------------------------------------------------|------|-----|-----|-----|---------|-------------|--------|------|--------|--------|
| Mechanical bending (1200 times)                                                    |      |     |     |     |         |             |        |      |        |        |
| Condition                                                                          | Rs   | Rct | W-R | W-T | W-P     | CPE1-T      | CPE1-P | Rct2 | CPE2-T | CPE2-P |
| Before bending                                                                     | 1.37 | 1.0 | 0.6 | 9   | 0.25    | $7.5E^{-5}$ | 0.85   | 0.3  | 0.19   | 0.4    |
| After bending                                                                      | 1.15 | 1.2 | 0.7 | 4   | $0.295$ | $7E^{-5}$   | 0.89   | 0.33 | 0.3    | 0.39   |

## **Supplementary Movies**

**Movie S1 | Exhibition of the flexibility of the freestanding 3D GCSS.**

**Movie S2 | Exhibition of the constant bending and folding of the Li-S soft-packaged battery.**

**Movie S3 | Exhibition of the dynamic bending experiment of the Li-S soft-packaged battery.**

**Movie S4 | Exhibition of 180 degrees folded 1 Ah Li-S soft-packaged battery attached on the small electric toy vehicle.**

**Movie S5 | Exhibition of the small electric toy vehicle driven by 1 Ah battery in a circle with a diameter of 20 cm.**
